# Supplementary material for: Insoluble dendrimer-grafted poly(vinylimidazole) microbeads stabilized with mono/bimetallic nanoparticle catalysts for effective degradation of malachite green
Source: Royal Society of Chemistry journal article supplement (doi:10.1039/c7nj01054k), 2017-01-01
Supplement: c7nj01054k1.pdf [file c7nj01054k1.pdf]

## Supporting Information

### **Insoluble Dendrimer Grafted Poly(vinylimidazole) Microbeads Stabilized with Mono/bimetallic nanoparticle as catalysts for Effective Degradation of Malachite Green**

EagambaramMurugan<sup>a\*</sup>, J. NimitaJebaranjitham<sup>b</sup>, K. JanakiRaman<sup>a</sup>, Abhishek Mandal<sup>a</sup>,  
D. Geethalakshmi<sup>a</sup>, M. DharmendiraKumar<sup>c</sup> and A. Saravanakumar<sup>c</sup>

<sup>a</sup>Department of Physical Chemistry, School of Chemical Sciences, University of Madras, Maraimalai Campus, Chennai - 600025, Tamil Nadu, India.

[Phone: 044-22202818; Email: dr.e.murugan@gmail.com, emurugan\_68@yahoo.co.in

<sup>b</sup> PG Department of Chemistry, Women's Christian College (Autonomous), College Road, Chennai - 600006, Tamil Nadu, India.

<sup>c</sup>Department of Applied Science & Technology, A. C. Tech, Anna University, Chennai-600025, Tamil Nadu, India

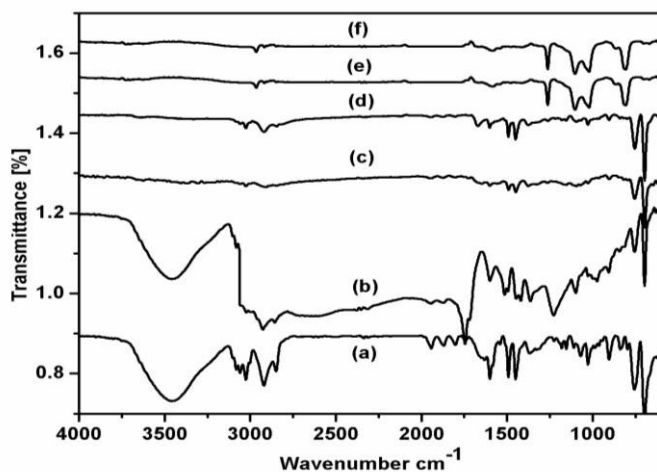

**Figure S1.** FT-IR spectra of HC (a) PVIIm (b) PVIIm-COOH (c) PVIIm-D(G2) (d) PVIIm-D(G3) (e) PVIIm-D(G2)-AuNPs (f) PVIIm-DG(3)-AuNPs

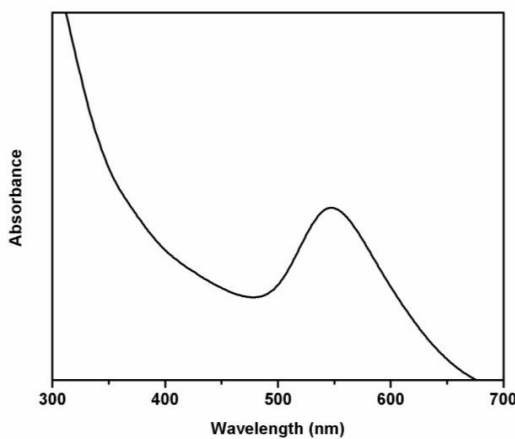

**Figure S2.** UV-Visible spectrum of LC-PVIIm-D(G3)-AuNPs

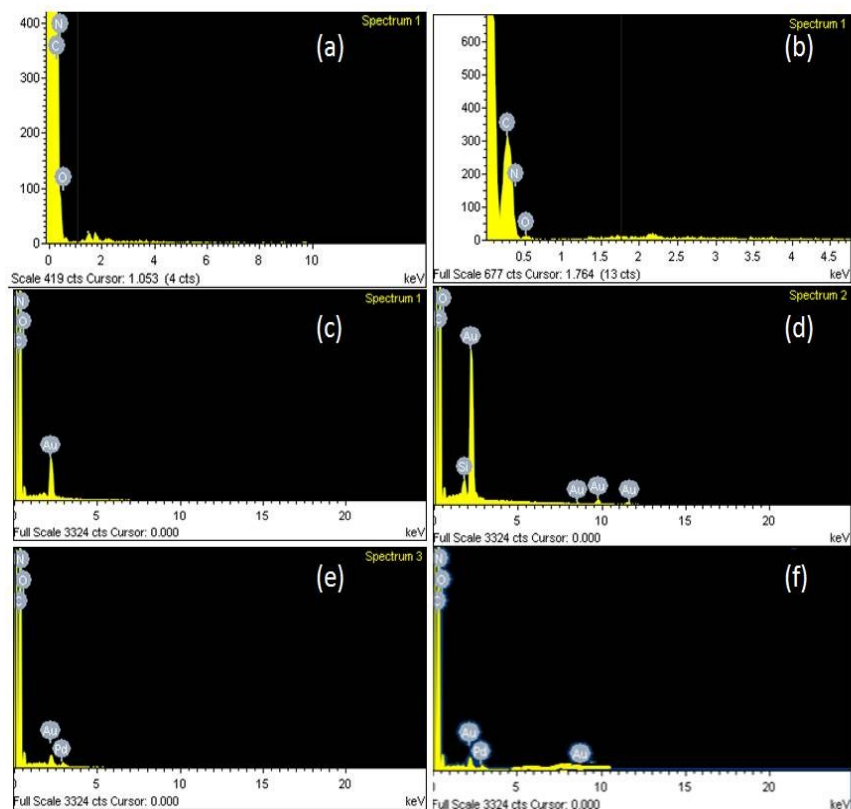

**Figure S3.** EDAX spectra of (a) LC-PVIm-D(G2) (b) LC-PVIm-D(G3) (c) LC-PVIm-D(G2)-AuNPs (d) LC-PVIm-D(G3)-AuNPs (e) LC-PVIm-D(G2)-AuPdNPs (f) LC-PVIm-D(G3)-AuPdNPs.

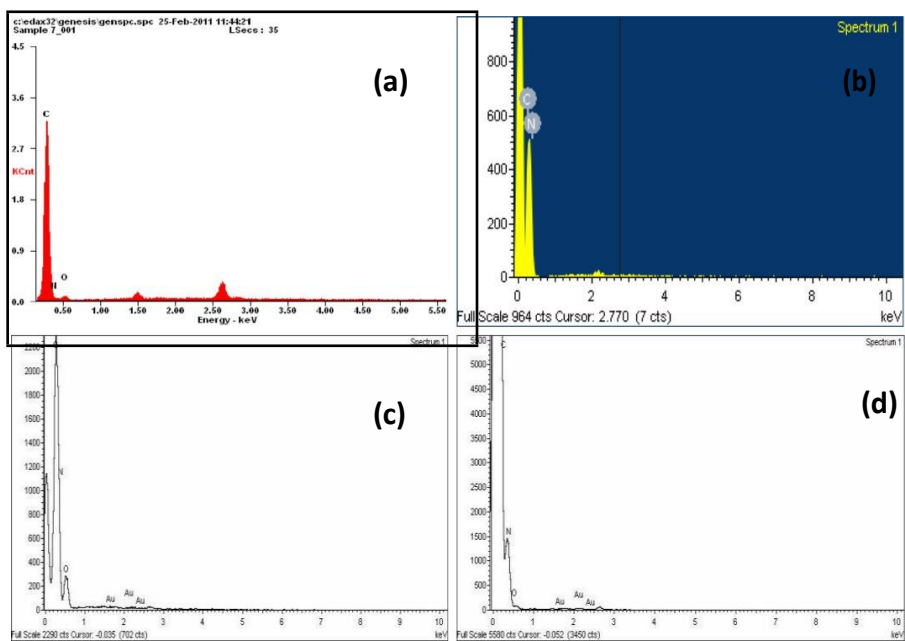

**Figure S4.** EDAX spectra of (a) HCVIm-D(G2) (b) HC-PVIm-D(G3) (c) HC-PVIm-D(G2)-AuNPs (d) HC-PVIm-D(G3)-AuNPs.

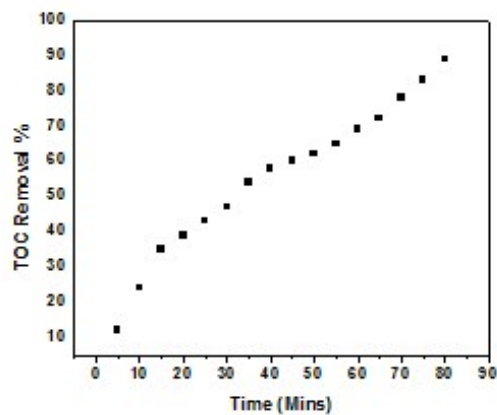

**Figure S5.** Variation of TOC Removal (%) obtained from TOC analysis

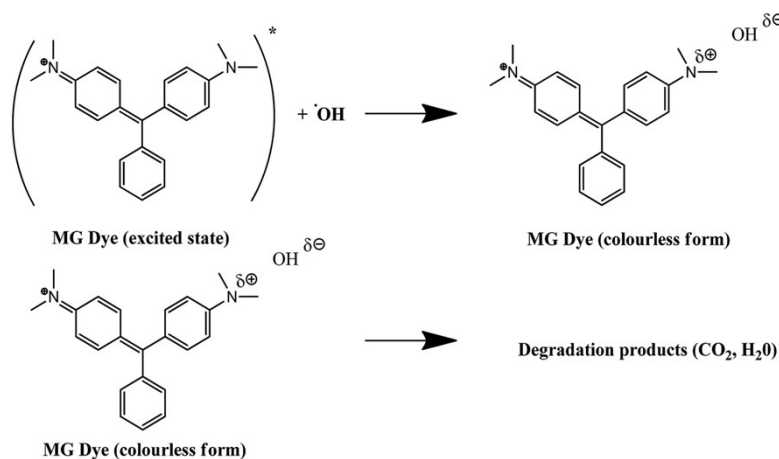

**Figure S6.** Mechanism for degradation of Malachite green

**Table S1.** Comparative catalytic efficiency of all the six types of bead-shaped heterogeneous nanoparticle catalysts derived from LC and HC-PVIm matrices for the reduction of Malachite green.

| Name of the catalysts | $k_{\text{obs}} 10^3(\text{min})$ |
|-----------------------|-----------------------------------|
| LC-PVIm-D(G2)-AuNPs   | 11.35                             |
| HC-PVIm-D(G2)-AuNPs   | 5.62                              |
| LC-PVIm-D(G3)-AuNPs   | 23.48                             |
| HC-PVIm-D(G3)-AuNPs   | 8.23                              |
| LC-PVIm-D(G2)-AuPdNPs | 27.50                             |
| LC-PVIm-D(G3)-AuPdNPs | 36.61                             |

**Table S2. List of main intermediates from the degradation of malachite green in the presence of superior catalyst detected by GC-MS**

| <b>m/z ratio<br/>(mins)</b> | <b>Name of the Intermediate</b>         | <b>Retention time</b> |
|-----------------------------|-----------------------------------------|-----------------------|
| 329                         | Malachite Green                         | 9.23                  |
| 315                         | Desmethyl- Malachite Green              | 8.16                  |
| 331                         | Leuco Malachite Green                   | 9.32                  |
| 317                         | Desmethyl- Leuco Malachite Green        | 6.87                  |
| 226.12                      | (Dimethylamino-phenyl)-phenyl methanone | 6.56                  |
| 120                         | N,N-Dimethylaniline                     | 6.08                  |
| 105.62                      | Benzaldehyde                            | 6.34                  |
| 77.85                       | Benzene                                 | 5.72                  |
